# Supplementary material
Source: PubMed Central journal article supplement (PMC6734143)
Supplement: mjy035_supplementary_material.pdf [file mjy035_supplementary_material.pdf]

## Supplementary material

Supplementary Fig.1

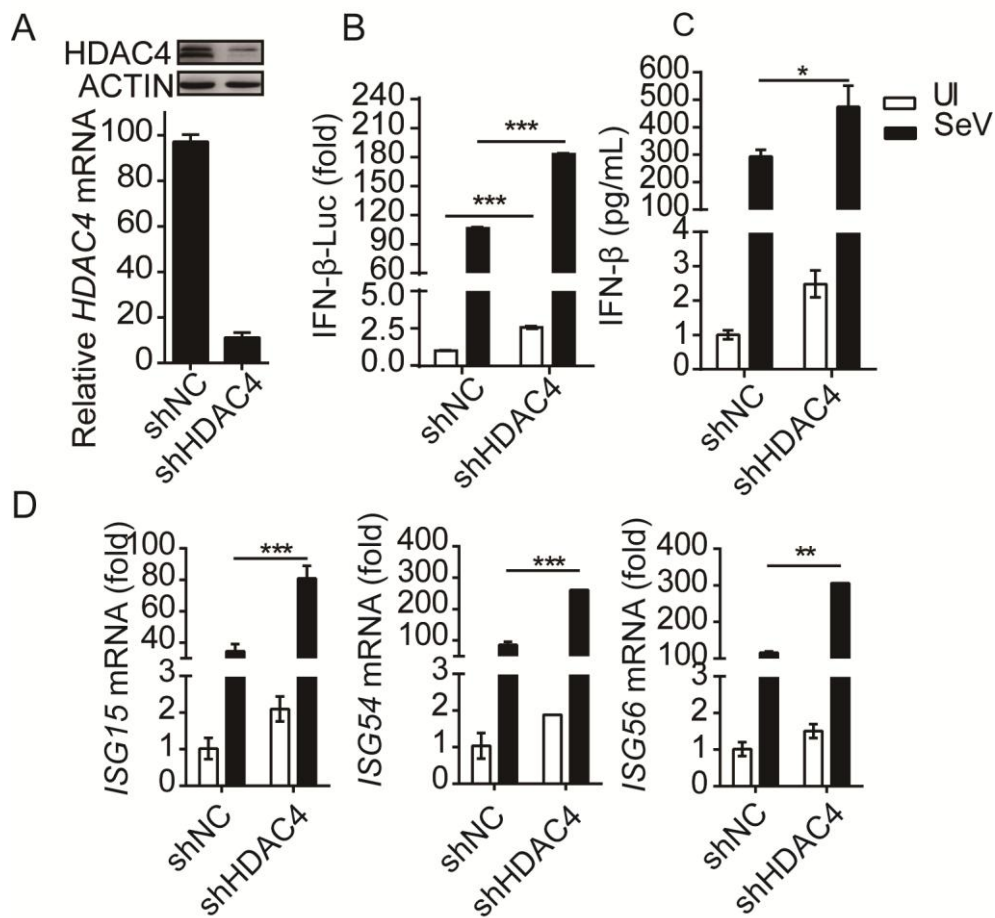

Supplementary Fig 1. Deficiency in HDAC4 arrestingly facilitates the production of IFN-β. (A) HEK293T cells were silenced with shNC or shHDAC4 to construct stable cell lines. Quantitative RT-PCR analysis of HDAC4 mRNA (below) and immunoblot analysis of HDAC4 and GAPDH (loading control throughout) (top) were carried out to analyze the Knockout efficiency. (B, C) Luciferase assays and ELISA of IFN-β (as shown in Fig 1 B, C) in shNC or shHDAC4 cell lines ( $2 \times 10^5$ ) transfected for 36 h with encoding an *IFN-β* firefly luciferase reporter (IFN-β-Luc), then left uninfected (UI) or infected for another 8 h with SeV. (D) Quantitative RT-PCR analysis of *ISG15*, *ISG54* and *ISG56* mRNA in shNC or shHDAC4 cell lines ( $2 \times 10^5$ ), then infected for another 8 h with SeV.

Supplementary Fig.2

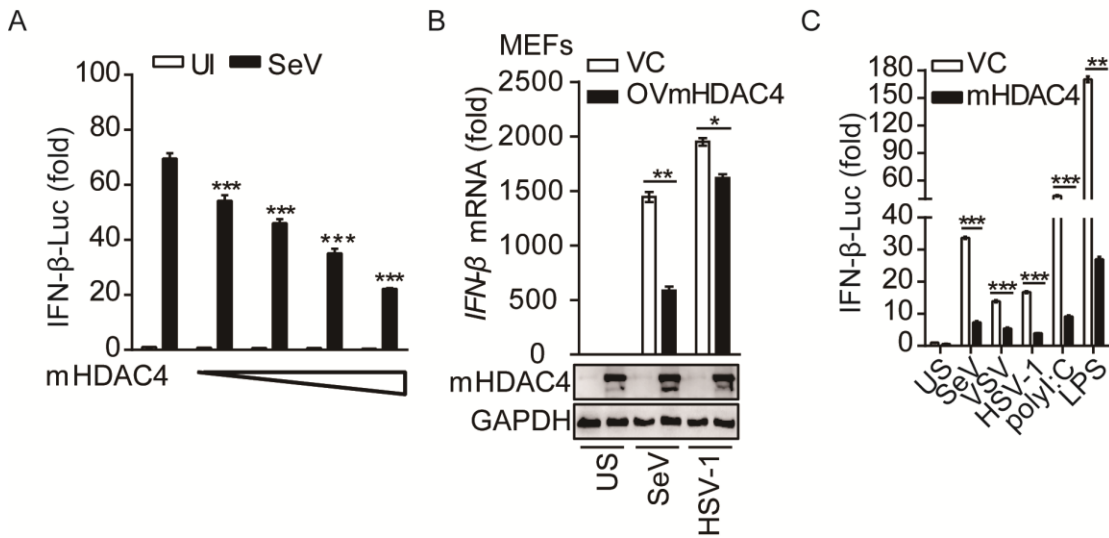

Supplementary Fig 2. HDAC4 is involved in virus-induced production of mouse IFN- $\beta$ . (A) Luciferase assay analysis *IFNB1* promoter activity in MEFs infected with Lentiviral vector carrying mouse HDAC4 gene (in gradient viral load) for 1 w, then expressing with IFN- $\beta$  firefly luciferase reporter (as shown in Fig 1B), left uninfected (UI) or infected for another 8 h with SeV. (B) Quantitative RT-PCR analysis of IFN- $\beta$  in MEFs infected with Lentiviral vector carrying mouse HDAC4 gene for 1 w, then stimulated with SeV or HSV-1 for 8 h. (C) Luciferase assay analysis *IFNB1* promoter activity in mouse macrophages (RAW264.7) transfected with encoding an IFN- $\beta$  firefly luciferase reporter treated for 8 h with SeV, VSV, HSV-1, poly(I:C) and LPS. \*  $p < 0.05$ , \*\*  $p < 0.01$  and \*\*\*  $p < 0.001$  (unpaired t-test). Data are from three independent experiments (a-c; mean and s.d. of three independent biological replicates per group).

Supplementary Fig.3

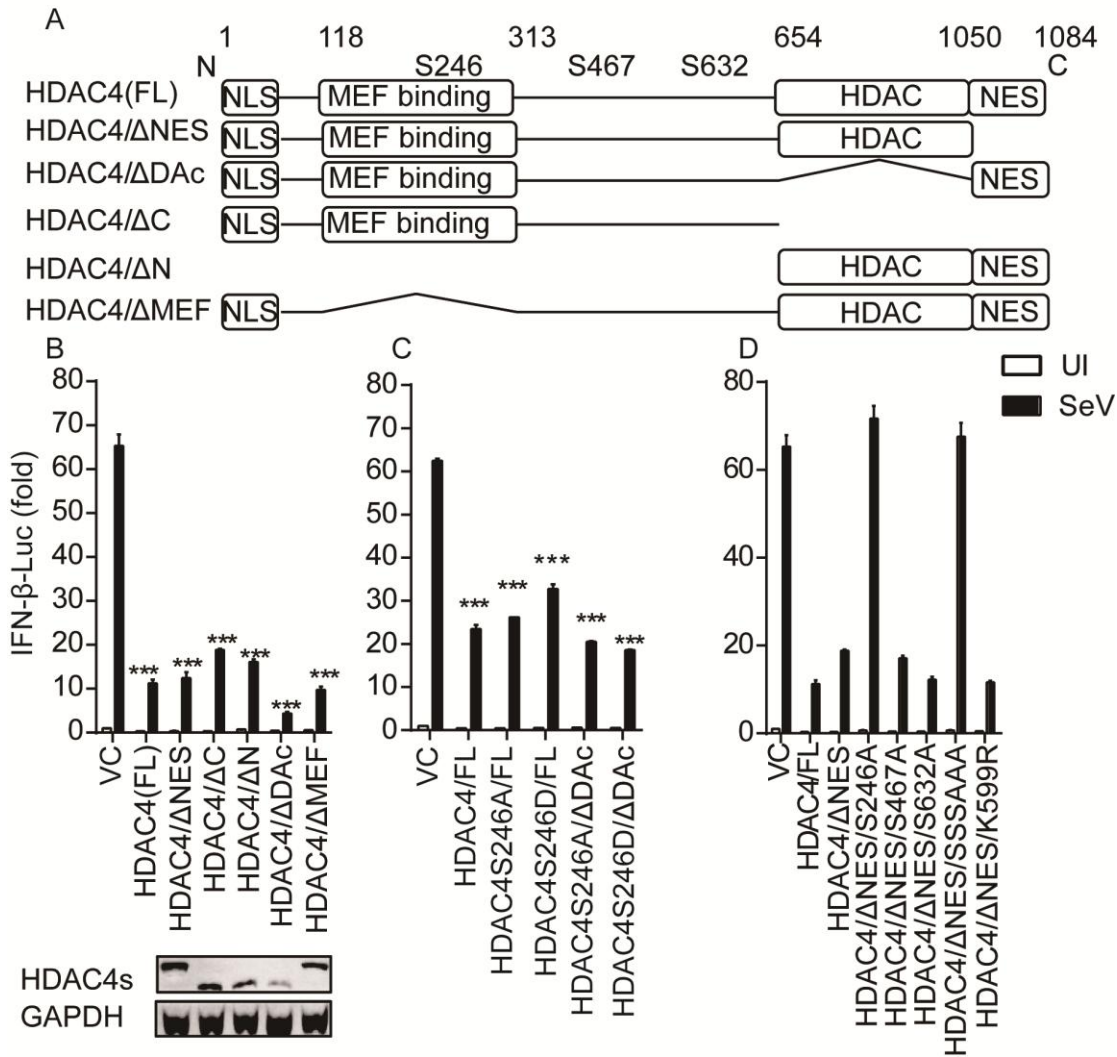

Supplementary Fig 3. Mapping the functional domain of HDAC4 in innate immunity. (A) Schematic representation of HDAC4 and its mutants. (B-D) Luciferase assay of an IFN- $\beta$  reporter in HEK293T cells transfected with control vector (VC) or vector encoding to wide-type (HDAC4/FL) or mutant HDAC4 (horizontal axis) and immunoblot analysis of mutant HDAC4 containing various combinations of those domains (bottom in B).

Supplementary Fig.4

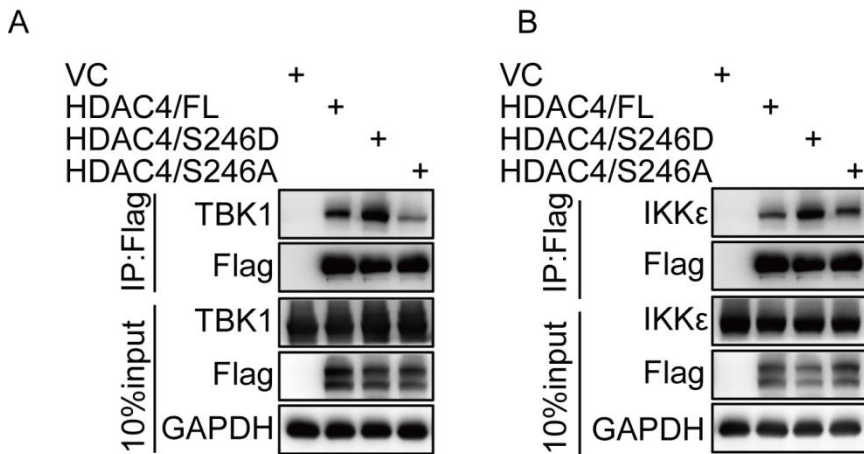

Supplementary Fig 4 (A, B) Immunoprecipitation and immunoblot analysis of lysates of HEK293T cells overexpressed HA-tagged TBK1 or HA-tagged IKKε and Flag-tagged wide-type HDAC4 (HDAC4/FL) or mutant of HDAC4 (HDAC4/S246D or HDAC4/S246A). Data are representative of three independent experiments.

Supplementary Fig.5

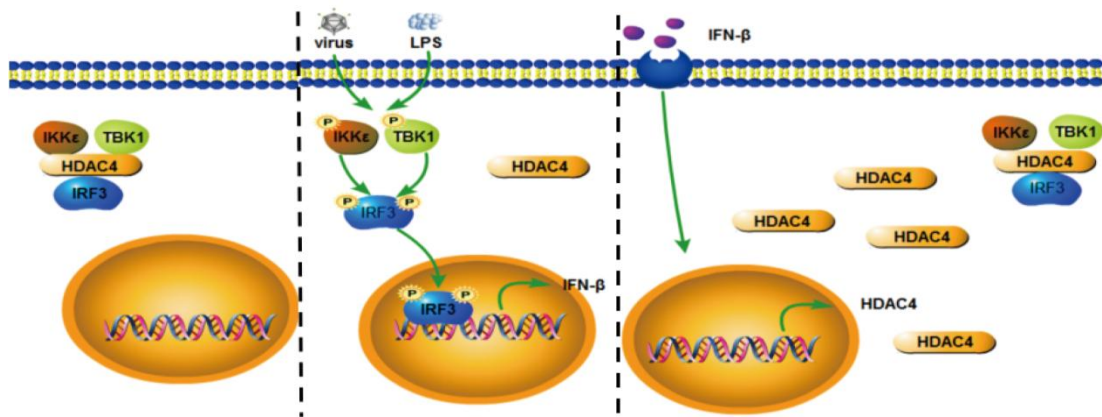

Supplementary Fig 5 The working patterns.

Supplementary Table S1. Primers used to amplify the different deletions of HDAC4

| HDAC4 deletions | Orientation | Sequence (5'-3')                                                | F indicate    |
|-----------------|-------------|-----------------------------------------------------------------|---------------|
| HDAC4/FL        | F/R         | <i>GCGGCCGC</i> CATGAGCTCCCAAAGCCATCCAGATCTCTACAGGGGCGGCTCCTC   | forward       |
| 1-1050/ΔNES     | R1050       | AGATCTCTAGTTCTCGCAAGTCTGAGCCTCG                                 | primers; R    |
| Δ655-1049/ΔDAc  | OCF         | AAGCCGAGGTTACGACAAACGAAGAAGCCGAGACG                             | indicate      |
| Δ655-1049/ΔDAc  | OCR         | CGTCTCGGCTTCTTCGTTTGTCTGTAACCTCGGCTTG                           | reverse       |
| 1-654/ΔC        | R654        | AGATCTCTATGTCGTGAACCTCGGCTTGG                                   | primers;      |
| 655-1084/ΔN     | F655        | <i>GCGGCCGC</i> GGCCTCGTGTATGACACG                              | OCF and       |
| 1-654-Δ118-313  | OCF         | ATCAAGCAACAACAGGAGAACGGTATCGCGCCCGCC                            | OCR           |
| 1-654-Δ118-313  | OCR         | GGCGGGCGCGATACCGTTCTCCTGTTGTTGCTTGATG                           | indicate      |
| S246A           | OCF         | TCTTAGGAAAACAGCTGCTGAACCGAATCTGAAATTAC                          | overlapping   |
| S246A           | OCR         | CCGTAATTTTCAGATTCGGTTCAGCAGCTGTTTTCCTAAG                        | complement    |
| S246D           | OCF         | TCTTAGGAAAACAGCTGATGAACCGAATCTGAAATTAC                          | ation         |
| S246D           | OCR         | CCGTAATTTTCAGATTCGGTTCATCAGCTGTTTTCCTAAG                        | forward or    |
| S467A           | OCF         | ACTGGGGCGGACCCAGGCGGCCCGCTGCCCCAGAAC                            | reverse       |
| S467A           | OCR         | GTTCTGGGGCAGCGGGGCCGCTGGGTCCGCCCCAGTG                           | primers,      |
| K559R           | OCF         | CAGGCCGGCGTGCAGGTGAGGCAGGAGCCATTGAGAG                           | respectively. |
| K559R           | OCR         | CTCAATGGGCTCCTGCCTCACCTGCACGCCGGCCTGTG                          | Italic        |
| S632A           | OCF         | CTGTCCCGGGCGCAGGCCTCACCCGCGTCTGCCACCTTC                         | indicate      |
| S632A           | OCR         | TGGCAGACGCGGGTGAGGCCTGCGCCCGGACAGAG                             | restriction   |
| H803L           | OCF         | CGCCCCCTGGACACCTTGCGGAGGAGAGCACGCC                              | site. Bold    |
| H803L           | OCF         | CGTGCTCTCCTCCGCAAGGTGTCCAGGGGGGCGGAC                            |               |
| mouse-HDAC4     | F/R         | <i>AAGCTT</i> ATGAGCTCCCAAAGCCATCCAGGGTACCTACAGTGGTGGTTCCCTCCTC |               |

denote termination codon.

Supplementary Table S2. Primers for mRNA Quantification

| Gene name | Orientation | Sequence (5'-3')                             | F indicate |
|-----------|-------------|----------------------------------------------|------------|
| HDAC4     | F/R         | AGCGTCCGTTGGATGTAC/CCTTCTCGTGCCACAAGTCT      | forward    |
| IFNB1     | F/R         | AGGACAGGATGAACTTTGAC/TGATAGACATTAGCCAGGAG    | primers; R |
| ISG15     | F/R         | GAGAGGCAGCGAACTCATCTT/CCAGCATCTTACCCTCAGG    | indicate   |
| ISG56     | F/R         | TAGCCAACATGTCTCACAGAC/TCTTCTACCACTGGTTTCATGC | reverse    |
| ISG54     | F/R         | GGTCTCTTCAGCATTTATTGGTG/TGCCGTAGGCTGCTCTCCA  | primers.   |
| ACTIN     | F/R         | GTGACGTTGACATCCGTAAGA/GCCGGACTCATCGTACTCC    |            |
